# Supplementary material
Source: Springer Nature journal article supplement (https://www.springermedizin.de/resource/supplementary/13026_2006_8_MOESM2_ESM.pdf/9644460)
Supplement: MOESM2 [file 9644460]

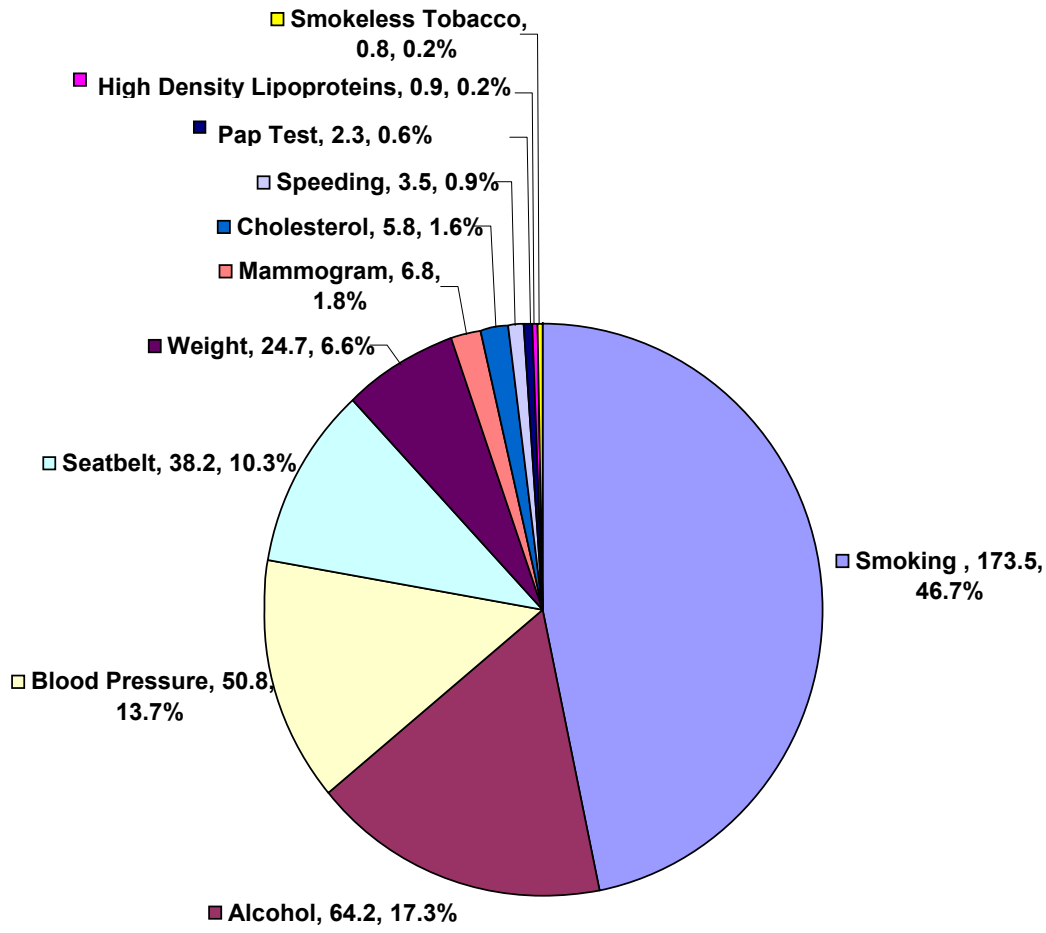

\*Percent refer to individual contribution of modifiable risk factor to total risk years gained.
